# Supplementary material for: Variations of the NodB Architecture Are Attuned to Functional Specificities into and beyond the Carbohydrate Esterase Family 4
Source: MDPI journal article supplement (doi:10.3390/biom14030325), 2024-03-08
Supplement: s1 [file s1]

## SUPPLEMENTARY INFORMATION

Variations of the NodB architecture are attuned to functional specificities into and beyond the CE4 family

Alexis S. Molfetas, Boutris Nikiforos, AnastasiaTomatsidou, Michael Kokkinidis & Vasiliki E. Fadouloulou

**Table S1.** NodB-domain containing CE4 proteins extracted from the Protein Data Bank before July 2023. Our analysis was performed at the non-redundant NodB-domains of the underlined structures. PG, DA and MD stand for Peptidoglycan, DeAcetylase and Molecular Dynamic simulations, respectively.

| Subgroups of CE4 family | Protein name/family | PDB code                                       | Organism                             | Activity data                                                                                                                    |
|-------------------------|---------------------|------------------------------------------------|--------------------------------------|----------------------------------------------------------------------------------------------------------------------------------|
| Chitin/Oligochitin DA   | CICDA               | <u>2IW0</u>                                    | <i>Colletotrichum lindemuthianum</i> | Active on (GlcNAc) <sub>3-6</sub> and partially deacetylated chitooligosaccharides                                               |
|                         | AnCDA               | <u>2Y8U</u>                                    | <i>Aspergillus nidulans</i>          | Active on (GlcNAc) <sub>2-6</sub> , chitosan, crystalline chitin, acetylxylin. Inactive on GlcNAc, peptidoglycan                 |
|                         | VpCOD               | <u>3WX7</u>                                    | <i>Vibrio parahaemolyticus</i>       | Active on (GlcNAc) <sub>2-4</sub>                                                                                                |
|                         | VcCOD               | 4NY2, 4NYU, 4NYY, 4NZ1, 4NZ3, 4NZ4, 4NZ5, 4OUI | <i>Vibrio cholerae</i>               | Active on (GlcNAc) <sub>2</sub>                                                                                                  |
|                         | ArCE4               | <u>5LFZ</u> , 5LGC                             | <i>Arthrobacter species</i>          | Active on (GlcNAc) <sub>3-6</sub> , chitosan, $\alpha$ - and $\beta$ -chitin, acetylxylin. Low activity on (GlcNAc) <sub>2</sub> |
|                         | BmCDA8              | <u>5Z34</u>                                    | <i>Bombyx mori</i>                   | Active on (GlcNAc) <sub>3-6</sub>                                                                                                |
|                         | BmCDA1              | <u>5ZNT</u> , 5ZNS                             | <i>Bombyx mori</i>                   | Deacetylates ethylene glycol chitin in the presence of accessory proteins                                                        |
|                         | AngCDA              | <u>7BLY</u>                                    | <i>Aspergillus niger</i>             | Active on GlcNAc <sub>2-6</sub> , weak activity on $\alpha$ -chitin and $\beta$ -chitin, slight increase on colloidal chitin     |
|                         | Pst_13661           | <u>8HF9</u> , 8HE1, 8HE2, 8HE4                 | <i>Puccinia striiformis</i>          | Gene knock-out makes it inactive against chitin.                                                                                 |

|                                              |                |                                                        |                                              |                                                                                                                                                                                                               |
|----------------------------------------------|----------------|--------------------------------------------------------|----------------------------------------------|---------------------------------------------------------------------------------------------------------------------------------------------------------------------------------------------------------------|
|                                              | VdPDA1         | <u>8HFA</u>                                            | <i>Puccinia striiformis</i>                  | Gene knock-out makes it inactive against chitin                                                                                                                                                               |
| <b>PG GlcNAc DA</b>                          | SpPgdaA        | <u>2C1G</u> , 2C1I                                     | <i>Streptococcus pneumoniae</i>              | Active on peptidoglycan                                                                                                                                                                                       |
|                                              | Bc1960         | <u>4L1G</u> , 5O6Y                                     | <i>Bacillus Cereus</i>                       | Active on peptidoglycan (from gram <sup>+/−</sup> bacteria), N-acetyl-D-glucosaminyl-( $\beta$ -1,4)-N-acetylmuramyl-L-alanyl-D-isoglutamine, (GlcNAc) <sub>4-6</sub> , glycolchitin                          |
|                                              | Bd3279         | <u>5JP6</u>                                            | <i>Bdellovibrio bacteriovorus</i>            | Active on peptidoglycan                                                                                                                                                                                       |
|                                              | Bc1974         | <u>5N1J</u> , 5N1P, 5NC6, 5NC, 5NCD, 5NEK, 5NEL        | <i>Bacillus Cereus</i>                       | Active on (GlcNAc) <sub>5</sub>                                                                                                                                                                               |
| <b>PG MurNAc DA</b>                          | BsPdaA         | <u>1W17</u> , 1W1A, 1W1B, 1NY1                         | <i>Bacillus subtilis</i>                     | Active on peptidoglycan. Protein/NAG complex (crystallography).                                                                                                                                               |
|                                              | BaCE4          | <u>2J13</u>                                            | <i>Bacillus Anthracis</i>                    | Putative activity. No biochemical characterization is provided; however, the protein is considered to be the <i>B. anthracis</i> ortholog of BsPdaA.                                                          |
| <b>PG MurNAc &amp; oligochitin DA</b>        | BsPdaC         | <u>6H8L</u> , 6H8N                                     | <i>Bacillus subtilis</i>                     | Active on (GlcNAc) <sub>4-5</sub> & chitooligosaccharide kinetics                                                                                                                                             |
| <b>Acetylxyloxy esterases</b>                | SICE4 (SIAXe)  | <u>2CC0</u>                                            | <i>Streptomyces lividans</i>                 | Active on 2-O-acetyl-4-nitrophenyl -D-xylopyranoside                                                                                                                                                          |
|                                              | CtICE4 (CtAXe) | <u>2C71</u> , 2C79                                     | <i>Clostridium thermocellum</i>              | Active on 2-O-acetyl-4-nitrophenyl -D-xylopyranoside                                                                                                                                                          |
|                                              | XylICE4        | <u>7AX7</u>                                            | <i>Trinervitermes trinervoides</i>           | Active on p-NPA (4-nitrophenyl acetate)                                                                                                                                                                       |
| <b>Poly-<math>\beta</math>-1,6-GlcNAc DA</b> | AdIcaB         | <u>4WCJ</u>                                            | <i>Ammonifex degensii</i>                    | Active on ( $\beta$ -1,6-GlcNAc) <sub>4</sub> and ( $\beta$ -1,6-GlcNAc) <sub>5</sub>                                                                                                                         |
|                                              | EcPgaB         | 3VUS, <u>4F9J</u> , 4F9D, 4P7L, 4P7N, 4P7O, 4P7Q, 4P7R | <i>Escherichia coli</i>                      | Active on $\beta$ -1,6-GlcNAc oligomers                                                                                                                                                                       |
|                                              | AaPgaB         | <u>4U10</u>                                            | <i>Aggregatibacter actinomycetemcomitans</i> | Active on 7-acetoxycoumarin-3-carboxylic acid                                                                                                                                                                 |
|                                              | BpsB           | <u>5BU6</u>                                            | <i>Bordetella bronchiseptica</i> periplasmic | Active on $\beta$ -1,6-(GlcNAc) <sub>1-5</sub>                                                                                                                                                                |
| <b>PG GAC linkage DA</b>                     | SpPplD         | <u>6DQ3</u>                                            | <i>Streptococcus pyogenes</i>                | de-N-acetylase of the cell wall linkage of streptococcal rhamnopolysaccharides                                                                                                                                |
|                                              | SmCE4          | <u>2W3Z</u>                                            | <i>Streptococcus mutans</i>                  | Active on (GlcNAc) <sub>6</sub> . No activity was observed toward shorter chitooligosaccharides or a synthetic peptidoglycan tetrasaccharide. Authors suggest activity on as-yet unidentified polysaccharide. |
|                                              | Bc0361         | <u>4HD5</u>                                            | <i>Bacillus Cereus</i>                       | -                                                                                                                                                                                                             |
|                                              | Ba0330         | <u>4V33</u>                                            | <i>Bacillus Anthracis</i>                    | Inactive on glycol chitin, GlcNAc <sub>2-6</sub> , p-nitrophenyl acetate, N-acetyl-D-                                                                                                                         |

|                                                                    |              |                                                  |                                      |                                                                                                                                                   |
|--------------------------------------------------------------------|--------------|--------------------------------------------------|--------------------------------------|---------------------------------------------------------------------------------------------------------------------------------------------------|
| Substrate<br>identification awaits<br>experimental<br>confirmation |              |                                                  |                                      | glucosaminyl-( $\beta$ -1,4)-N-acetylmuramyl-L-alanyl-D-isoglutamine                                                                              |
|                                                                    | Ba0331       | <u>6GO1</u>                                      | <i>Bacillus Anthracis</i>            | -                                                                                                                                                 |
|                                                                    | PAO1         | <u>1Z7A</u>                                      | <i>Pseudomonas aeruginosa</i>        | -                                                                                                                                                 |
|                                                                    | HpPgda       | <u>3QBU</u> , 4LY4                               | <i>Helicobacter pylori</i>           | Inactive on GlcNAc, GlcNAc <sub>3</sub> , N-acetyl putrescine, N-acetyl spermidine, N-acetyl cadaverine, N-acetyl dipeptides, allantoin           |
|                                                                    | Bb0128       | <u>3HFT</u>                                      | <i>Bordetella bronchiseptica</i>     | -                                                                                                                                                 |
|                                                                    | MsCE4        | <u>3RXZ</u>                                      | <i>Mycobacterium Smegmatis</i>       | -                                                                                                                                                 |
|                                                                    | BpCE4        | <u>3S6O</u>                                      | <i>Burkholderia pseudomallei</i>     | -                                                                                                                                                 |
|                                                                    | Bacova_03992 | <u>4DWE</u>                                      | <i>Bacteroides ovatus</i>            | -                                                                                                                                                 |
|                                                                    | EcCDA        | <u>2VYO</u> [Error! Reference source not found.] | <i>Encephalitozoon cuniculi</i>      | Inactive on chitooligosaccharides and crystalline $\beta$ -chitin. EcCDA exhibited no de-N-acetylase activity on neither of the substrates tested |
|                                                                    | ErPgda       | <u>5JMU</u>                                      | <i>Eubacterium rectale</i>           | -                                                                                                                                                 |
|                                                                    | CsCE4        | <u>7FBW</u>                                      | <i>Caldanaerobacter subterraneus</i> | -                                                                                                                                                 |
|                                                                    | ATU2773      | <u>2QV5</u>                                      | <i>Agrobacterium tumefaciens</i>     | -                                                                                                                                                 |
| Pseudo deacetylases                                                | Ba0150       | <u>4M1B</u>                                      | <i>Bacillus Anthracis</i>            | No activity                                                                                                                                       |
|                                                                    | Ba3943       | <u>6HM9</u> , 6HPA<br>7BKF                       | <i>Bacillus Anthracis</i>            | -                                                                                                                                                 |



MHNGIRMTTLVKRAMLVCAGVLFTYEVAFGSVHTALASTEDEAKSVQLVSEIQTSLAPKEAPKHYNGQVRKVAYLTFDDGPGKYTAE  
LLDMLKKENAKATFFLIGSNVKAFPDLVKREDAEGHYVGMHSMTHNYKKLYTEGHYVDEMKEQGLIAGVLGKSPVLTRPSYSGMP  
GLNEALRNKVVENGLKVDWDWTDISLDWKYNKMQVDAASAKIVENVLHGATNPTEVILMHDHQPVSVAVPGIIGKGLKEKGYLEAYN  
ENEHFPLNFWHDNRM

>BC5204

MIKRVPQCILFLTITMYVSSNTEATTVIPAEYHPNTETTSTPTQKIAYLTFDDGPNKYTTQILNILKEKNGKATFFVIGGKVPHYKKTMQRL  
IKDGHYIGLHSMASHDVKRLYTGDPTSLIAEMEQTQSIVQQVTCLNTHLVRVPYGSMPYLLKKNYRDALVSAQYKMWDTIDTYDWKS  
YDNPSAILERVRNQSQDEQVEVILMHDSSVTVQILPKVIDYLQSQGYKLLPYNPSSHLKVNFWKDTL

>BsPdaC

MLAKRIKWFWHVLIAVVCVVLIGFFHNHSLKKETVMNKKVRTDSQYGNVEIATLVNDGKTFNYAVNYPVFKNEKMDSALKRFAEKEVR  
QFQKETKDQVDEHTTKRNLNVYKIVHYAKQTVAIVFNEYKYIGGAHGQTVKKTFFNYDFSKQAFLSIDDFKEDADYHLKLSLIAHYE  
LKKNKDIAADDALLKEGTAPKKENFSRFAIKEDYIELYFDTYQVAAGYLGEQSIAIKSLKDLKEQYIDKAKNKNKIKEQPKHEVIS  
LPKEETVDPNQKVIALTFDDGPNPATTNQILDLSKKYKGHATFFVLGSRVQYYPETLIRMLKEGNEVGNHWSHPLLTRLSVKEALKQI  
NDTQDIIEKISGYRPTLVRPPYGGINDELRSQMKMDVALWDVPEDWDRNKKTTIVDRVMNQAGDGRITLHDIYRTSADAADDEIHKLL  
TDQGYQLVTVSQLEEVKKQREAK

>HP0310

MAKEILVAYGVDIDAVAGWLGSYGGEDSPDDISRGFLAGEVGIPRLLKLFKKYHLPATWFSFGHSIETFSEQMKMIVDAGHEVGAHGY  
SHENPIAMTAKQEDVLLKSVELIKDLTGKAPTGYVAPWWEFSNITNELLKHGFKYDHSMLMHNDFTPYYVRVGDWSWKIDYSLEAKD  
WMKPLIRGVETDLVEIPANWYLLDLPMMFIKKSPNSFGFVSPHDIGQMWDQFQDWWYREMDYAVFSMTIHPDV SARPVLLMHEKII  
EHINKHEGVRWVTFNEIADDFLKRNPCK

>CdPdaV

MRNKKKKINRKKLYLLLSAIVVCLAFIVVGVRVSSLNMKENEISRNAKLSSTITDIVSNTSIEVSKGPSKSSGKIA YITIDGSPSKFTDQMI  
KTLNKNVVKATFFMIDGNMKKEYPQQVKNIKNGTAGFHSVSHDIHKLVTSTSAKEEFTNDQTFYKITGKHSKVRIPYGSKPYPQ  
ASYQALVDAGYKIWDWDLDTEDWRSNSSQIVQNVKNHIKNRKGEDKQDLVVLMEKKQSAEALDSVLKFLSDEGYEFAPVDQNPQIP  
KNYWLRNLE

>SpPgdA

MNKSRLGRGRHGKTRHVLALIGILAISICLLGGFIAFKIYQQKSFEQKIESLKKEKDDQLSEGNQKEHFRQGOAEVIAYYPLQGEKVISS  
VRELINQDVKDLESKDNLFYYTEQEESEGLKGVVNRNVTQKIYDLVAFKIEETKTSLGKVHLEDGQPFLLDQLFSDASKAKEQLIK  
ELTSFIEDKKIEQDQSEQIVKNFSDQDLNFWDFYKDSQIILYPSVVENLEELPVS AFFDVIQSSYLLEKDAALYQSYFDKHKHKKVVA  
LTFDDGPNPATTPQVLETLAKYDIKATFFVLGKNVSGNEDLVKRIKSEGHVVGHNWSHPILSQLSLDEAKKQITDTEVDLTKVLGSSSK  
LMRPPYGAITDDIRNSLDLSFMWVDVSLDWKSKNEASILTEIQHQVANGSIVLMHDIHSPTVNALPRVIEYLNKNGQYTFVTIPEMLNTR  
LKAHELYYSRDE

>SsPgdA

MKKVSFWLGINIALLGIMVSLAVWFLAGLQERQVSQFIEEKQQTILAKGKGKIQEGNIDTTHVVAALPTDDAGHVLGPVESRMISYVQR  
RFGHKKPAGKIQKLVFVSSIEGKTNFKNVTAREIQAEHYKVDNLQIKKQDKLPSEVLLTQDNELFTLEDLLPNLSSAASIIVDHLREAL  
AQGMKETDVEAIVKKFETLDLNAISFSYGDSQLTLQLPDGYGINQLVLPISDLYPVVKSDYLVADAKVGYDEYMAAQVVDKHLRQV  
ALTFDDGPNPNTTPVVDLLKKYNAKATFFVVGKAVVGNEAILRRMVAEGHVIANHTWNHPNLVTISGEQVQREIQDTQAAITEATGI  
VPTMVRPPYGSYNQAVVNQMGPLPSIYWSVNSKDWKSRNPQAILKEIKEQTCPGSIILMHDHQS TVDSLESVLQYL TGEGYNMVTVTD  
LLASPLNPQLIYYSQELSGPAQ

>LmPgdA

MKIRWIRLSLVAIIIAVVFIVGIFQKYQFSKSRNKVIMQMDRLMKDQDGGNFRRLDKKENGVEIISYIPKTTEKKDNEIQQEIGKATD  
AEVKKLNDRKETQGIIFYTYQKHRMAEQAISYKAVQSEYVKEGRTKFVLKDKKDICKNIVTDAETGALLTLGEVLIKSNTKLNKLTAV  
EEELIKTGDFSLKDVGNLGGIKSLVKWNQTDFEITNSEIILPVKIPGAPEPKVKVKLADIASSVKNRYLPSSVKVPEVPKAKTNKRIALTF  
DDGPSSSVTPGVLDLTKRHNVKATFFVLGSSVIQNPGLVKRELEEGHQVGSWSHDHPQLTKQSTQEVYNQILKTQKAVFDQTGYFPTT  
MRPPYGAVNKQVAEEIGLPIIQWSVDTEWKYRNAGIVTKKVLGATDGAIVLMHDIHKTAAASLDTTTLKLKSQGYEFVTIDELYGE  
KLQIGKQYFDKTD SRMVK

>LiPgdA

MKQRRLLKSKGAKKAFWKLTLIGALLIVAGVGTYYYDQGVQKQKIAIEKQVDEARNAKDKAYDSRKANDIEQAHKLIDKLHVKDK  
TSLDKSMSQLTNYLSEIDKVNQIVAKAHENISEEGIKSSEEALELLKAPYEKSDKEALAKQVNADKQILIERQKEAELIANVQNQYANKK  
LIALTFDDGPNPNTTPQLLKIFSDAQVPATFFALGKQAQACPQIIEEADRGNEVASHTWDHKDLVTLSPDQKQIEESANQLINKITGN  
VTLFRPPYGSYNKSVLSQTNLSAVNWTVDNDWRVYRTSAPVVQNVSTY AHDGAILMHDHQSVDVAPVQIKNLKAQGYTFVTVSTL  
LTVQDGGAKAQQVYFGR

>EfPgdA

MRHKKRKFINGYVLFSALILIVLFIQTFLLTQPKITSKNDDTTQTSTKNSTAKKDSPTKLEKESTHMTISSKKYAYSADKIRKYITGEEP  
YKGEKLVFLTFDDGVNNQITPQVLDLTKKYNVHATFFLVGNLTSENQKIVKREVAEGHSIGFHSSTHDYATLYPNGIVNTKEIQAEIAT  
MENSLKKILGETFTTLWRYPGGHMSWGGTEKSDLEFKQLGIHWIDWNAMVGDAEPLDRQPTTVAEMLAFHQHSLEVYPDYNIRVVL  
MHDSVDKELTKALPQLIEFYQANGYQFGVLY

>Bd0468

MMKRPISLALSALTATSLAHAQEEALPQAPSNEKLIELQTTQGMKRAMKILNIESEWGIFDKFKPNRCKYAIQVPDSVTRGTIALTFD  
DGNPNDTTPILDLVKAHNAKGTFFILGSKIKGNEAILRRMVAEGHQLANHSYSHPNFHELSSSRMNSEIKTTDRLLRTVGTFRFFRYPY  
GNSTCSSNELVSSLGYVNVGWDIDTCDWAFADGQVSDKENATCQAPQHLRRDYAGYVANVVAQTQGGVLLMHDHKNHTAHSLDRL  
MTMLEQDGYRFVSLDRNIFPKLNRR

>Bd3279

MYMKKL VFGGMLIVSAASLVGCGSQIGSSVRQAVSDNQSAQTLVWENSEANPEALFANWRHEFMVDSSKRESMKTELCKELQALPQ  
DLTLFENEIRDENNRALVSGCKEELLAQVDEHFDEQRESMSVPGHALKAVQSRNSFRFPDNTQKRDMNGYMAVRGDVARKEVVLT  
DDGPHGLYTDAILRALKEVNAKAMFFATGKSVRTNPEALKRVAADGHVIGSHSITHACLGTSVACYKQMGNRNLTFDEAAA EVRGGQ  
AVFDVLGWVDPVFRFPYGETSKDLKAFKTKSTGEFAWNIESDDWRTQSNQELLARVLANVESQGRGIVLFHDIQRRTAEIMPQFLREL  
YNRGYSVVLLTAADPSAKYNSKLVKRKQQLP

## MurNAc PG deacetylases:

>BsPda-1W17

MKWMCSICCAAVLLAGGAAQAEAVPNEPINWGFKRSVNHQPPDAGKQLNSLIEKYDAFYLGNTKEKTIYLTDFDNGYENGYPKVLVDV  
LKKHRVTGTTFFVTGHFVKDQPPQLIKRMSDEGHIIGNHSFHHPDLTTKTADQIQDELDSVNEEVYKITGKQDNLYLRPPRGVVFSEYVLKET  
KRLGYQTVFWSVAFVDWKINNQGKGGKYAYDHMIKQAHPGAIIYLLHTVSRDNEALDDAITDLKKQGYTFKSIDDLMEFEKEMRLPSL

>BsPdaC

MLAKRIKWFWHLIAVVCVVVLIGFFHNHSLKKETVMNKKVRTDSQYGNVEIATLVNDGKTFNYAVNYPVFKNEKMDSALKRFAEKEVR  
QFQKETKDVDQEHTTKRNLNVDYKIVHYAKQTVAIVFNEYKYIGGAHGQTVKKTFNYDFSKQAFLSIDDIFKEDADYLHKLSLIAYHE  
LKKNKDIAADDALLKEGTAPKKENFSRFAIKEDYIELYFDITYQVAAGYLGEQSAIKKSLKDILKEQYIDKAKNKNKIKEQKPKHEVIS  
LPKEETVDPNQKVIALTFDDGPNPATTNQILDLSKKYKGHATFFVLGSRVQYYPETLIRMLKEGNEVGNHNSWSHPLLTRL SVKEALKQI  
NDTQDIIKISGYRPTLVRPPYGGINDELRSQMKMDVALWDVPEDWKDRNKKITVDRVMNQAGDGRITLHDIYRTSADAADIEIHKKT  
DQGYQLVTVSQLEEVKKQREAK

>CIPdaA1

MKKDSLKKYIMIGAFALILFGIASINFKSLDKTKTQISSERTLDTHEYDWYFNPREDGKQPSPIKEADFFKKYGAYYVGNPNEKVIYLSFDA  
GYESGNTPKLLDTLKKHNAKAQFFVVESYIKSNPELIKRMKEGHLVCNHKSHPSMAGITDFEKFKEEITSVEKAYKDVGTGKEMPKYF  
RPPMGKFSEQLKYTQDLGYKSIFWSFAYVDWYEKKQPTHEFAKNKIYSRTHPGAIVLLHPNSSNTTEILDEVLTHWEKEGYKLKTLDY  
LNNKK

>CIPdaA2

MFRKVLHYLTLLSISIFFIVGCSNSQNNQNNENQNKETQLQEDKEKIDSGKDTSNVIVSDGTDKPSKATTNNDNNKLDVSSLDNTTLDWF  
YIPNNKHKTPEVNTDIEFKFSDYDALYNGPTKDGQKTLYLTFDEGYENGYTTKILDTLKQNVKAVFFVTAPYIKENKDLVKRMVSEG  
HIVGNHSKTHPSMPTKSNLKNFNDELYDVEKLYKDVGTGKDMVKFFRPPMGKYSEKSLAMTKNLGYKTVFWSFAYRDWDTDKQPSH  
EATQKIMDNLHDGSILLHLHAVSKTSTEILNDFISNARKLGYEFELLEY

>BaCE4-2J13

MAYTNTPHNWGIPRPKNETVPDAGKLYTDLLQKNGGFYLGDTKKKDIYLTDFDNGYENGYTGKILDVLKEKKVPATFFVTGHIYKTQDL  
LLRMKDEGHIIGNHSWSHPDFTAVNDEKREELTSVTTEEIKKVTGQKEVKYVRPPRGVFSERTLALTKEMGYYNVFWSLAFLDWKVDE  
QRGWQYAHNNVMTMIHPGSILLHLHAISKDNEALAKIIDDLREKGYHFKSLDDLKSNQP

## Chitin/oligochitin deacetylases:

>CICDA-2IW0

MHFSTLFGAAATAALAGSTNASPLARRQVPVGTPILOCTQPLVALTYDDGPFTFTPQLLDILKQNDVRATFFVNGNNWANIEAGSNPD  
TIRRMRADGHLVGSHTYAHPDNLTLSSADRISQMRQLEEATRRIDGFAPKYMRAPYLSCDAGCQGDGLGGLGYHIIDTNLDTKDYENNK  
PETTHLSAEKFNNELSADV GANSYIVLSHDVHEQTVVSLTQKLIDTLKSKGYRAVTVGECLGDAPENWYKA

>5LFZ-ArCE4

AGQPEPVATPPAVDCATTCKVALTFDDGPGEYTNRLLEDELSEQHTPATFFVLGKNVKKYPKTLKRMVDEGHQIGSHTFDHKDITKLTA  
EGIEHEVQWTDEAIEQAAGVKPQILRPPYGAHGAVYDRLIPYPLVLWDVDTLDWKHHPQKTVRIALEEAKPGSIILMHDIHESSVKA  
PQLVSKLHDAGYTLVTVDQLFAGTDFKPAKAYDHRFKTNP

>5Z34

TELPLATPCDEEACKLPDCRCSSTNIPGGLRARDTPQFVTVTFFDDGINVINIETYREVLYGRSNSNRCPAGATFYVSHEYTNYQLVNELY  
NRGFEIALHSISHRTPQAFWADATYQNLVQEIGDQKRQMAHFASIPASAIKGVRIPLQMSGNTSFQVMADFDLLDYCTWPTALTNP  
LWPTYTLHHESIQCIIPPCTASIPGPWVLP MISWRDLNFPSCSMVDGCFPTPDRTDDEGWFKFILTNFERHYLGNRAPFGFFVHEWFISS  
NPAIKRAFVRFMDIINLNDVFMVNSAEVIDWVKNPVPIDRYRQQQCKFTMPSICRPSFCGPLTGTHNQLSYYMTICNTCPRNPYPWVG  
NPLGQ

>A.nidulans CDA

MLFPNVPGVASLLSLFAATLILNTQALAINLTDRQPRVSYGLYIHHCYVPGVVALTFFDDGPYIYTEELLDILAQYGAKATFFVNGH  
NLAGNEWLIQRVVNEGHLASHTWGHDTLTVLSYDQIVDMQTRLESFAFVASVGVVPTYMRPPYLAANDYVLGVMAELGYHVIGASV  
DTKDYENDHPDLIGRSVAKFNQELDQGGTIVLSHDIHEQTVRTLTHIMLEEVYERGLQPTTVGGCLGDDAWYR

>R.circinans CDA1

MVWKTAFSAIAIASVNAVTTNFTSKTDPTNITIPAIEQTTSHPVKECTSYQSPYTINQAEWPTSWTTATSNMGMTSAEFQALYNSIDWT  
KAPNFPVRKLSATTGGLDMTGYDTATDPACWWSSTCTKPKTEGINADLYACPEPDVWGLTFDDGPNCSHNAFYDYLEQNKLKASMF  
YIGSNVLNWPYGALRGVKGHHIAGHTWSHQLMTTLTNQEILAELEYTQKAIKYVTGITPKYWRPAQGDIDDRVRWIATQLNLTAIW  
NLDTTDDWAAGTTPGITAETVNQNYEDFIKMGSNGTANTGNVLSHEINNMTMSFFMNHYEIEIKAYTHVLVDVATCMNITNPYQETTI  
TFPTFDQAINGASVSTSNGSSTSASAKSAGTSVQLNASLLVAALMGLMVL

>R.circinans CDA2

MVWKTAFSAVAIASVNAVTTNFTSTVDPANITIPAIQTTSLDPVKECTSYQAPFAFDQKEWPTNWDVATSNMGMTSAEFQALYKSID  
WTKAPNFPVRGISTTTGGLDMTGYDTAKDPACRWSSSTNCKTPKTEGINADIYACPEPDVWGLTFDDGPNCSHNAFYDYLEQNKLKAS  
MFYIGSNVNVNWPYGAMRGIKDGHIIAGHTWSHQLMTTLTNQEVLAELYYTQKAIKYVTGTPKYWRPAQGDIDDRVRWIATQLNLTAIW  
AILWNLDTDDWAAGTTPGITAETVSQNYEDYIKMGSNGTANTGNVLSHEINNMTMGFFLDHYEIEIKAYTHVLVDVATCMNITNPY  
ETTPTFTFEQAIGGASAFASNGFFNGTSPLSVAASKSAGAPIQLNGSLLVAALMGLLVFA

>R.circinans CDA3

MYIKTSAIAIALQVACFAEAAKKTSSKSSKSLDKPQDYWKSFKSLVDPNNITIADIPQTTSTNPSDECKWYEPPSNFVYDTKEWPNLW  
EATSNGMTKTSEFQALNKSIEWSKAPKIPVRKAGSDGSLDMTKYSDDPDCWWSSTCTKPKHKDINEDIYACPEPETWGLTYDDGPN  
CSHNAFYDYLEQNKLKASMFYIGSNVNVNWPYGAQRGVKAGHHIADHTWSHQLMTTLTNDEVLAELEYTQKAIKMVTGVTPLYWRPA  
FGDVDDRVRWIATQLNLTTVLWNLDTDDWAAGSSKTLDEVKATYDSYVEMGSNGTFATSGQIVLTHEIDNTTMSLAMEYLPKIKAA  
KNVVDVATCMNITYPYQEHNVSFAPFGSAADESTATSTNATASSASASAAATSEDEPGTTVIPLAANKAQIASAGIQVNPNSLVFAAFVA  
AAYFF

>S.cerevisiae Cda2p

MRIQLNTIDLQCIIALSCLGQFVHAEANREDLKQIDFQFPVLERAATKTPFPDWLSAFTGLKEWPGLDPPIPLDFIDFSQIPDYKEYDQN  
HCDSVPRDSCSFDCHHCTEHDDVYTCSKLSQTFDDGPSASTTKLLDRLKHNSTFFNLGVNIVQHPDIYHRMQKEGHLIGSHTWSHVYLP  
NVSNEKIIAQIEWSIWAMNATGNHTPKWFRPPYGGIDNRVRAITRQFGLQAVLWDHDTFDWSSLNDSVITEQEILQNVINWNKSGSGL  
ILEHDSITEKTVDLAIKINKLIGDDQSTVSHCVGGIDYIKEFLS

**Poly-β-1,6-GlcNAc deacetylases:**

>AdIcaB-4WCJ

SSGLVPRGSHMESPRTPAGTHLQGDGLVVLGYHRVLPSSRYAISRREFAQQLDYLRQVGVRVTPQEAEDYLAGRIHLPGLVLTFFDD  
GDLSVYRHAFFVLKRRKIPFLFFVIAGQVGRKWEFGSMCSWEQIKEMVASGLCVVGLHTYDLHYWDSQAKKPVFLLPGRERLFAEDT  
ARGTACLKEHLGLKTRYFAYPYGFGTPTTDEILRTQGFSLVFTLRKAVNRPGDAPFVGRVLTPTDSWPQVAAWAQASP

>SeIcaB

MKPFKLIFISALMILIMTNATPISHLNAQANEENKKLYEKNALALNYHRVRKKDPLNDFISLLSGSKEIKNYSVTDQEFKSQIQWLKA  
HDAKFLTLKEFIKYKEKGKFKRSVWINFDDMDQTIYDNASVLLKYYHIPATGFLITNHIGSTNFHNLNLLSKKQLDEMYETGLWDFES  
HTHDLHAKKGNKSKFLDSSQSVASKDIKKSEHYLNKNYPKNERALAYPYGLINDRIKAMKKNGIQYGFTLQEKAVTPDADNYRIPRI  
LVSNDAFETLIKEDGDFDEEK

>EcPgaB

MLRNGNKYLLMLVSIIMLTACISQSRTSFIPPQDRESLLAEQPWPHNGFVAISWHNVEDEAADQRFMSVRTSALREQFAWLRENGYQPV  
SIAQIREAHRGGKPLPEKAVVLTFDDGYQSFYTRVFPILQAFQWPAVWAPVGSWVDTPADKQVKFGDELVDREYFATWQQVREVAR  
RLVELASHTWNSHYGIQANATGSLPPVYVNRAYFTDHARYETAAEYRERIRLDAVKMTEYLRTKVEVNPHVFVWPYGEANGIAIEELK  
KLGYDMFFTLSEGLANASQLDSIPRVLIANNPSLKEFAQQIITVQEKSQPRIMHIDLQVYDENLQQMDRNIDVLIQRVKDMQISTVYLQ  
AFADPDGDGLVKEVWFPNRLPMKADIFSRVAWQLRTRSGVNIYAWMPVLSWDLDPTRLTRVKYLPTEGKKAQIHPEQYHRLSPFDDR  
VRAQVGMLYEDLAGHAAFDGLFHDDALLSDYEDASAPAITAYQQAGFSGLSEIRQNPEQFKQWARFKSRALTDFTLELSARVKAIRG  
PHIKTARNIFALPVIQPESEAWFAQNYADFLKSYDWTAIMAMPYLEGVAEKSADQWLIQLTNQIKNIPQAKDKSILELQAQNWQKNGQ  
HQAISSQQLAHWMSLLQLNGVKNYGYYPDNFLHNQPEIDLIRPEFSTAWYPKND

>BbBpsB

GSHMPDPDDGLTFRVLSMHDVRDNLRASFADMPDQFAIETRTLTDLFEWIRVKGFPNISMQQIIDS RAGVRPLPPRPILLTFDDGYASTY  
TKVFPLLAAFNYPAVVAVVTSWTDAPAGTKIRLSPKIEVPHDFFMTWAQLREMAQSGLVELASHSHNLHRGVLANPQGNEQPAASSRQ  
YLPASGRYENDA EYRARVRQDLKTS AHLIRHHTGVTIRSIVWPYGAHNRD TDQVAAEVGLNIGLTLQPGPNTPDVALTQIRSLVDYEV  
NVATVARAMR

>AaPgaB-4U10

MDRYGVLAYHSVVDDTAAKEEKQYFPQTISANLLISHFNWLKDNGYNVSWQQIIDAENGKSTLPEKAVVLSFDDGYATMYNVIYPIL  
KAYNYPVAFAPVSSWLDTPVNQLIPYANIKLPRNVFVTWDQVREMEQSGLVEIASHTDNLHHGVRANPAGSQLPAVVAPPEYKNNRYE  
SKTEYKNRLVQDFSRSSKSIQRQIGKKPRIMVWPYQG FNDVAIDAAKQSGMTHHFGQKIINKIGDRYVGRLLIDTETGFTIKNFLDG  
VDDESKLMR
